# Supplementary material for: Weissella cibaria Relieves Gut Inflammation Caused by Escherichia coli through Inflammation Modulation and Gut Microbiota Regulation
Source: MDPI journal article supplement (doi:10.3390/foods13071133), 2024-04-08
Supplement: s1 [file s1]

## Article

# *Weissella cibaria* Relieves Gut Inflammation Caused by *Escherichia coli* through Inflammation Modulation and Gut Microbiota Regulation

Xiaoyu Liu <sup>1,2</sup>, Nan Jiang <sup>1,2</sup>, Xinyue Wang <sup>1,2</sup>, Haowen Yan <sup>1,2</sup>, Lili Guan <sup>1,2</sup>, Lingcong Kong <sup>3,4</sup>, Jingrui Chen <sup>3</sup>, Haipeng Zhang <sup>1,2,\*</sup> and Hongxia Ma <sup>1,2,3,\*</sup>

## Supplementary Table

**Table S1.** Enzymatic stability of *Weissella cibaria* P-8 cell-free supernatant.

| Enzyme       | Producer | Broth medium | Inhibitory circle diameter (mm) |
|--------------|----------|--------------|---------------------------------|
| Catalase     | Maclean  | LB           | 22.67±0.28                      |
| Trypsin      | Maclean  | LB           | 21.46±0.34                      |
| Pepsin       | Maclean  | LB           | 22.33±0.12                      |
| Proteinase k | Maclean  | LB           | 23.52±0.19                      |

**Table S2.** Drug resistance sensitivity of *Weissella cibaria* P-8 cell-free supernatant.

| Category        | Antibacterial drug | Drug sensitivity paper concentration (µg/piece) | Criterion for judgement |              |                | Drug sensitivity results |
|-----------------|--------------------|-------------------------------------------------|-------------------------|--------------|----------------|--------------------------|
|                 |                    |                                                 | esistance(R)            | resonance(I) | sensitivity(S) |                          |
| β-lactams       | Cefoperazone       | 75                                              | ≤17                     | 18~20        | ≥21            | I                        |
|                 | ceftriaxone        | 30                                              | ≤14                     | 15~17        | ≥18            | I                        |
| Aminoglycosides | gentamycin         | 10                                              | ≤12                     | 13~14        | ≥15            | R                        |
|                 | amikacin           | 30                                              | ≤14                     | 15~16        | ≥17            | R                        |
| macrolides      | erythromycin       | 15                                              | ≤13                     | 14~17        | ≥18            | I                        |
|                 | azithromycin       | 15                                              | ≤13                     | 14~17        | ≥18            | I                        |
| Tetracyclines   | tetracycline       | 30                                              | ≤14                     | 15~18        | ≥19            | S                        |
|                 | minocycline        | 30                                              | ≤12                     | 13~15        | ≥16            | S                        |
| 4-quinolones    | levofloxacin       | 5                                               | ≤12                     | 13~17        | ≥18            | R                        |
|                 | ciprofloxacin      | 5                                               | ≤14                     | 15~21        | ≥22            | S                        |
